# Supplementary material for: A Conserved Arginine-Rich Motif within the Hypervariable N-Domain of Drosophila Centromeric Histone H3 (CenH3CID) Mediates BubR1 Recruitment
Source: PubMed Central journal article supplement (PMC2966416; doi:10.1371/journal.pone.0013747), 2010-10-29
Supplement: pone.0013747.s004.pdf [file pone.0013747.s004.pdf]

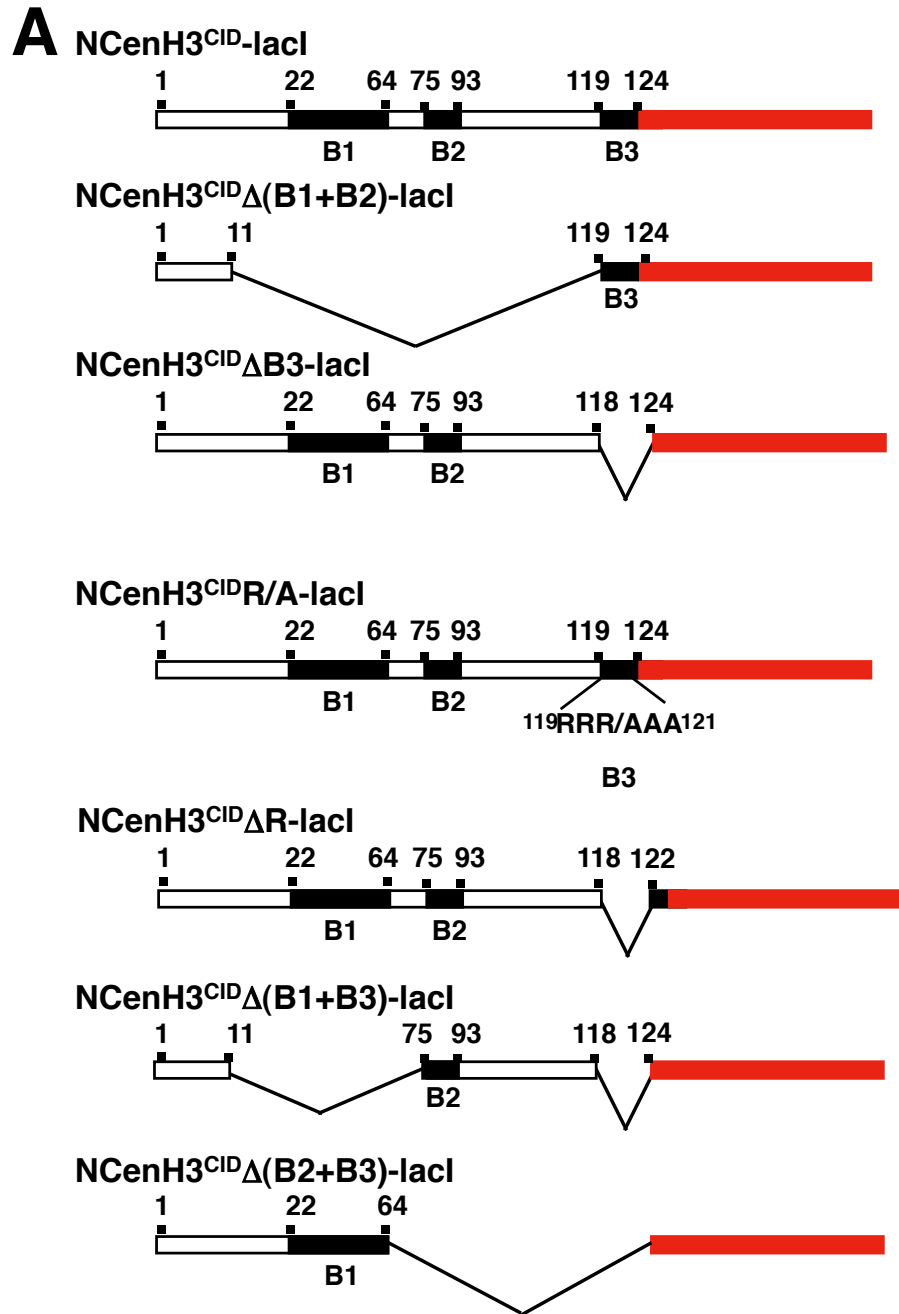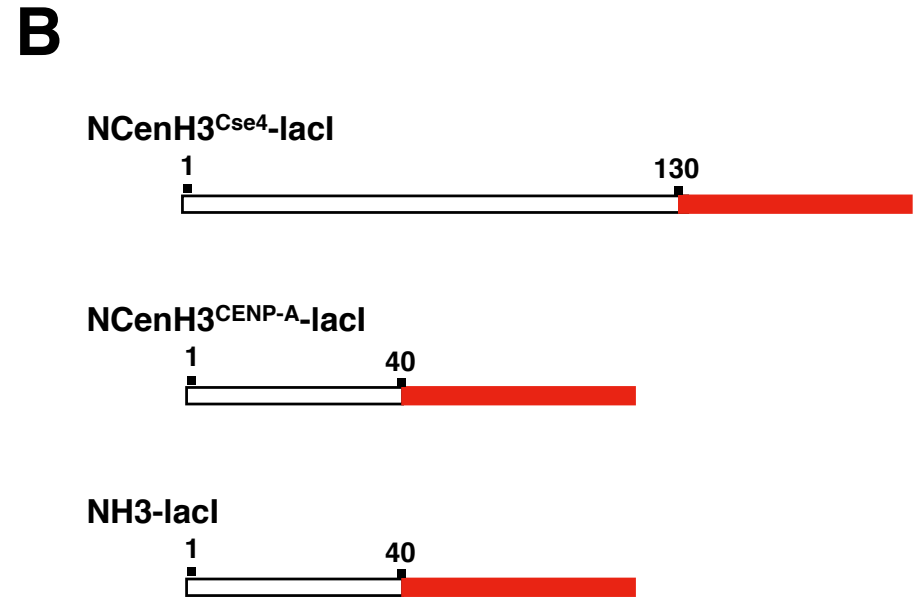

**FIGURE S4**
